# Supplementary material
Source: Springer Nature journal article supplement (https://www.springermedizin.de/resource/supplementary/12967_2012_1197_MOESM4_ESM.pdf/9573300)

CNT

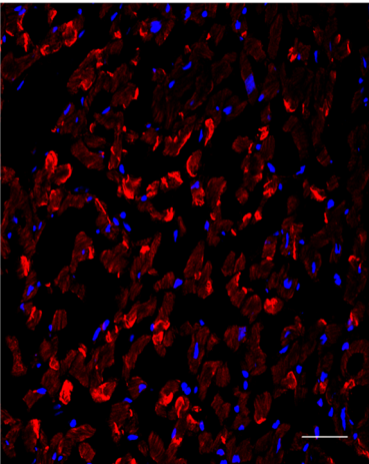

ICM

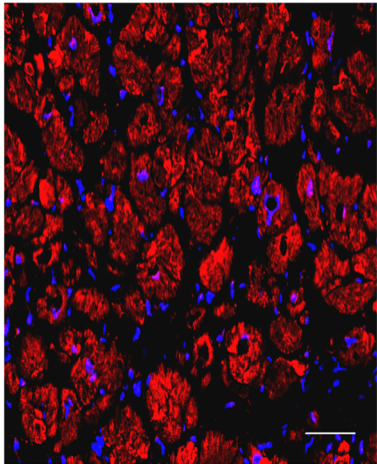

Supplement: MOESM4 [file 9573300]
